# Supplementary material for: Agreement between the International Physical Activity Questionnaire and Accelerometry in Adults with Orthopaedic Injury
Source: PubMed Central journal article supplement (PMC7504024; doi:10.3390/ijerph17176139), 2020-08-24
Supplement: ijerph-17-06139-s001.pdf [file ijerph-17-06139-s001.pdf]

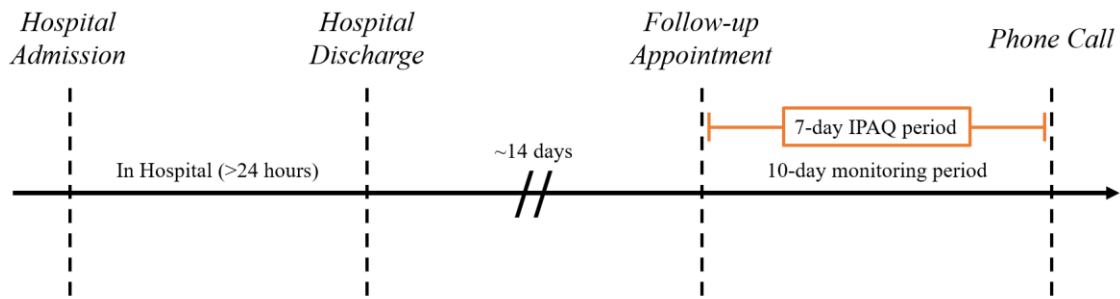

**Supplementary Figure 1:** Schematic of study methods. IPAQ (International Physical Activity Questionnaire).
